# Supplementary material for: Flexible transparent graphene laminates via direct lamination of graphene onto polyethylene naphthalate substrates
Source: PubMed Central journal article supplement — Nanoscale Adv. 2020 Jun 9;2(8):3156–63. doi: 10.1039/d0na00046a (PMC9416925; doi:10.1039/d0na00046a), 2020-06-09
Supplement: NA-002-D0NA00046A-s001.pdf [file NA-002-D0NA00046A-s001.pdf]

## Supplementary Information

### Flexible transparent graphene platforms via direct lamination of graphene onto polyethylene naphthalate substrates

Ismael G. Serrano<sup>1</sup>, J. Panda<sup>1</sup>, Tomas Edvinsson<sup>2</sup>, and M. Venkata Kamalakar<sup>1\*</sup>

<sup>1</sup>Department of Physics and Astronomy, Uppsala University, Box 516, SE-751 20 Uppsala, Sweden

<sup>2</sup>Department of Materials Science and Engineering, Uppsala University, Box 534, SE-751 21 Uppsala, Sweden

\* E-mail: [Venkata.mutta@physics.uu.se](mailto:Venkata.mutta@physics.uu.se)

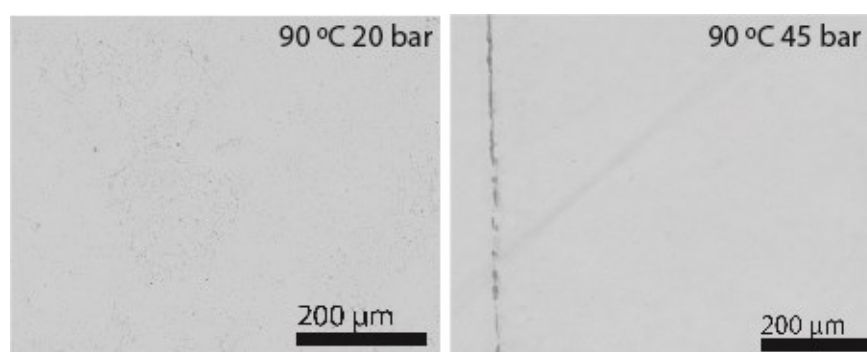

Figure S1. Optical microscopy images of samples laminated at 90 °C.

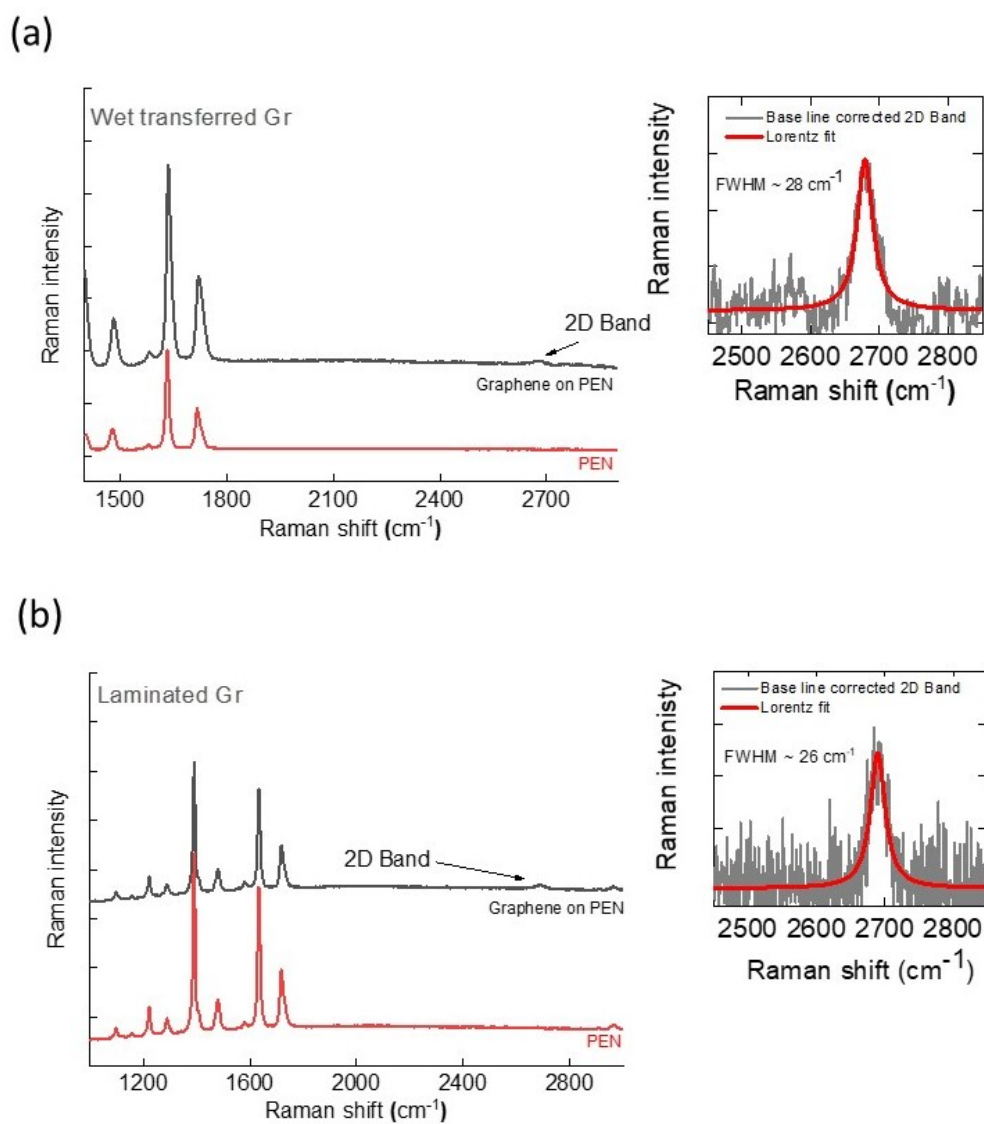

Figure S2. Raman spectra of CVD graphene transferred over PEN substrate (a) obtained by conventional wet transfer., (b) Graphene laminated over PEN. The inset displays the 2D peak FWHM of the respective samples.

The FWHM obtained by fitting 2D peak for both laminated and wet transferred graphene show single layer nature of the graphene.

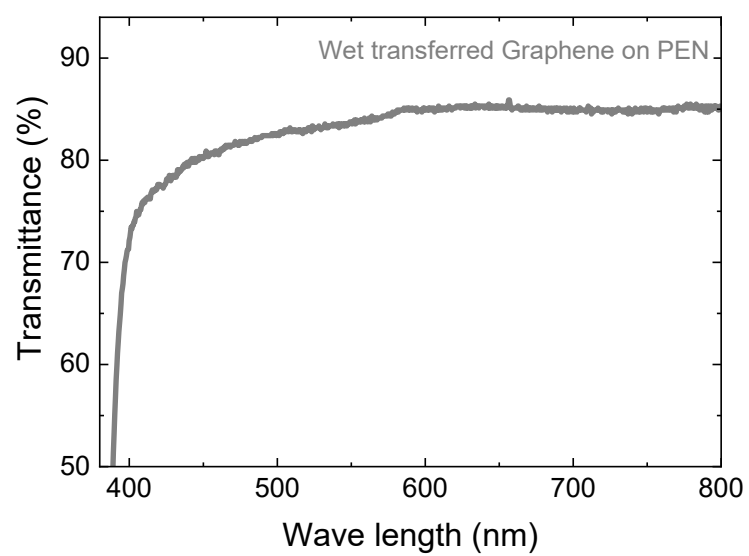

Figure S3. Transmittance as a function of wavelength for graphene over PEN by conventional wet transfer.
